# Supplementary material
Source: PubMed Central journal article supplement (PMC3526990)
Supplement: pro0021-1481-SD1.pdf [file pro0021-1481-SD1.pdf]

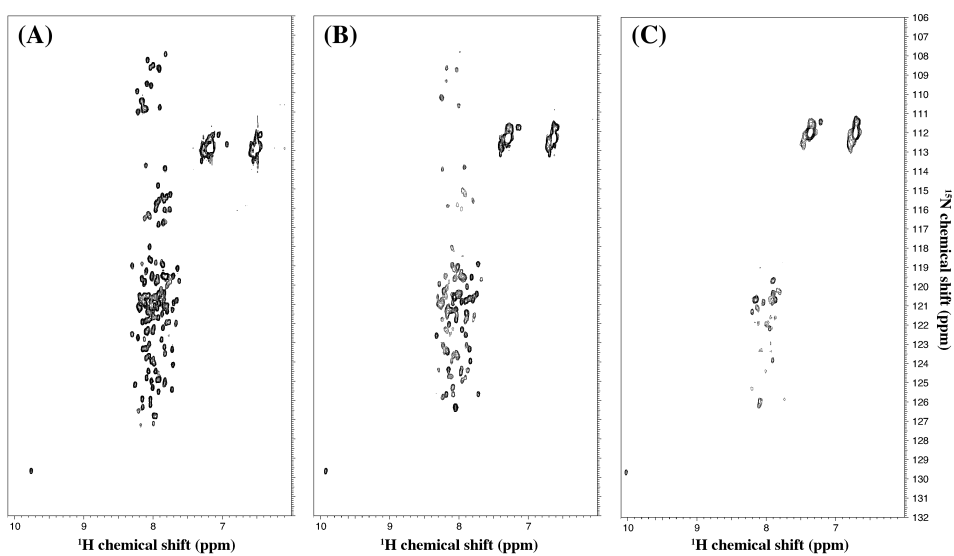

**Figure S1.**  $^1\text{H}$ - $^{15}\text{N}$  HSQC spectra of isolated QB domains recorded at 4 (A), 25 (B) and 37 °C (C). The spectrum recorded at 4 °C after increasing the temperature to 37 °C was indistinguishable from (A), indicating that the disappearance of the peak was not due to the formation of irreversible aggregates.
