# Supplementary material
Source: PubMed Central journal article supplement (PMC3526990)
Supplement: pro0021-1481-SD2.pdf [file pro0021-1481-SD2.pdf]

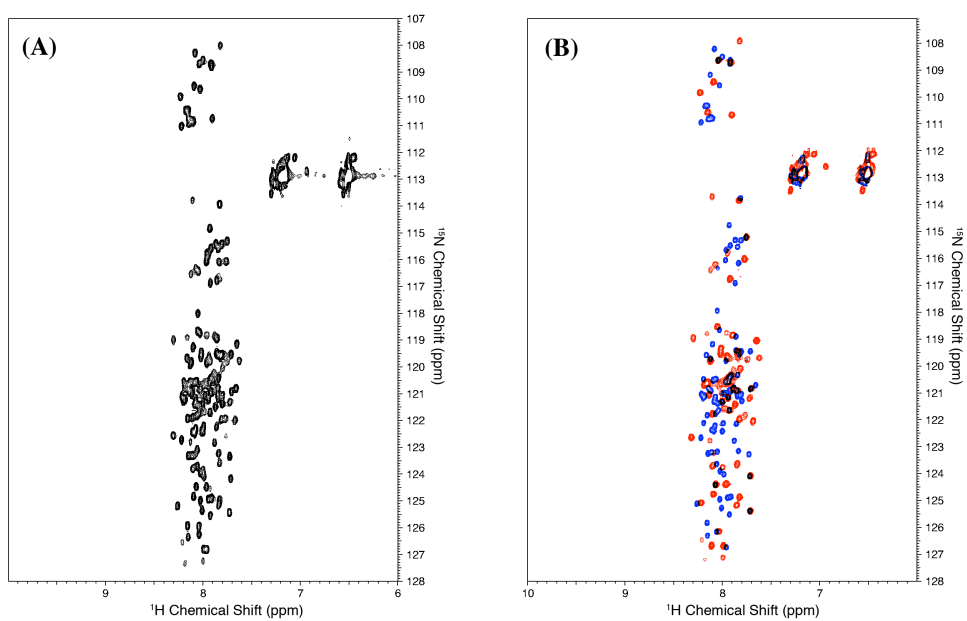

**Figure S2.**  $^1\text{H}$ - $^{15}\text{N}$  HSQC spectra of the full-length QB domain (A) and partial fragment proteins (B). In (B), the spectra of fragment proteins Bn and Bc are shown in blue and red, respectively.
