# Supplementary material
Source: PubMed Central journal article supplement (PMC3526990)
Supplement: pro0021-1481-SD3.pdf [file pro0021-1481-SD3.pdf]

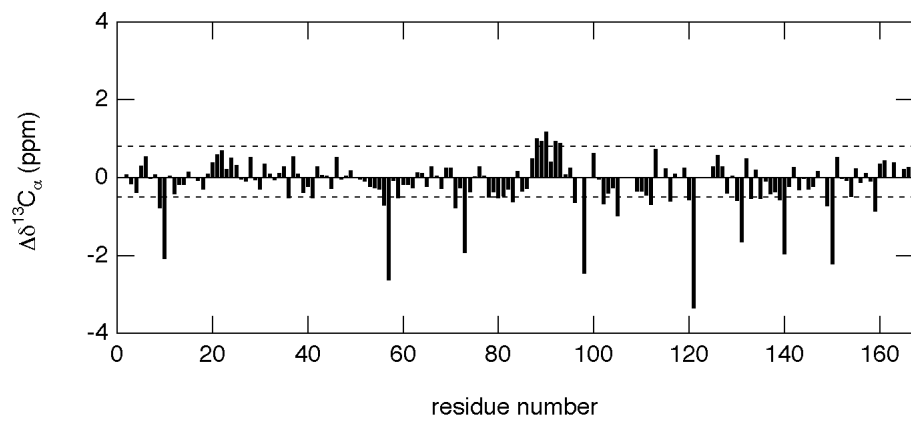

**Figure S3.**  $^{13}\text{C}_\alpha$  secondary chemical shift of QB domains plotted against residue number.

The empirical thresholds for  $\alpha$ -helices ( $\Delta\delta_{\text{C}_\alpha} > 0.8$ ) and  $\beta$ -sheets ( $\Delta\delta_{\text{C}_\alpha} < -0.5$ ) are indicated by broken lines.
