# Supplementary material
Source: PubMed Central journal article supplement (PMC3526990)
Supplement: pro0021-1481-SD4.pdf [file pro0021-1481-SD4.pdf]

**Table S1**

Sedimentation equilibrium analysis of isolated QB domains.

| Protein Concentration ( $\mu\text{M}$ ) | MW                 | $K_a$ ( $\text{M}^{-1}$ ) |
|-----------------------------------------|--------------------|---------------------------|
| 50                                      | $24,400 \pm 300^a$ | n.d. <sup>b</sup>         |
| 100                                     | $23,200 \pm 200^a$ | n.d. <sup>b</sup>         |
| 150                                     | $21,300 \pm 100^a$ | n.d. <sup>b</sup>         |
| 50–150 <sup>c</sup>                     | $18,400^d$         | $4500 \pm 300$            |

<sup>a</sup>Weight-averaged molecular weight calculated with equation [1].<sup>b</sup>not determined.<sup>c</sup>Global fit using equation [3] at three different protein concentration.<sup>d</sup>Fixed value calculated from the amino acid sequence.
